# Supplementary material for: New Principles of Polymer Composite Preparation. MQ Copolymers as an Active Molecular Filler for Polydimethylsiloxane Rubbers
Source: MDPI journal article supplement (doi:10.3390/polym13172848), 2021-08-25
Supplement: s1 [file s1]

# Supplementary Materials: New Principles of Polymer Composite Preparation.

## MQ Copolymers as an Active Molecular Filler for Polydimethylsiloxane Rubbers

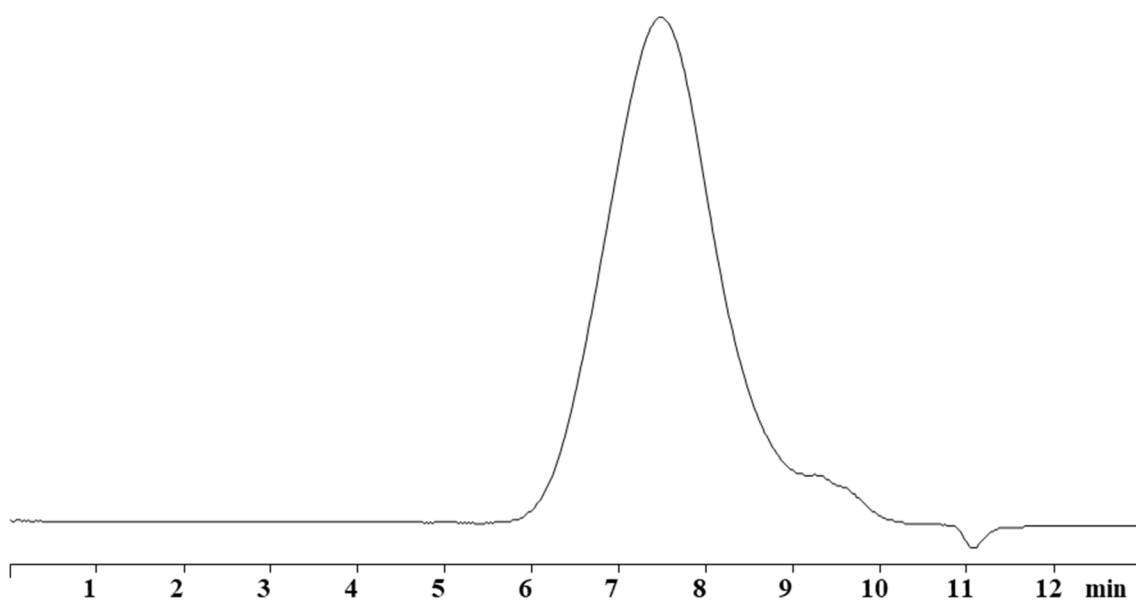

**Figure S1.** GPC curve of P1.

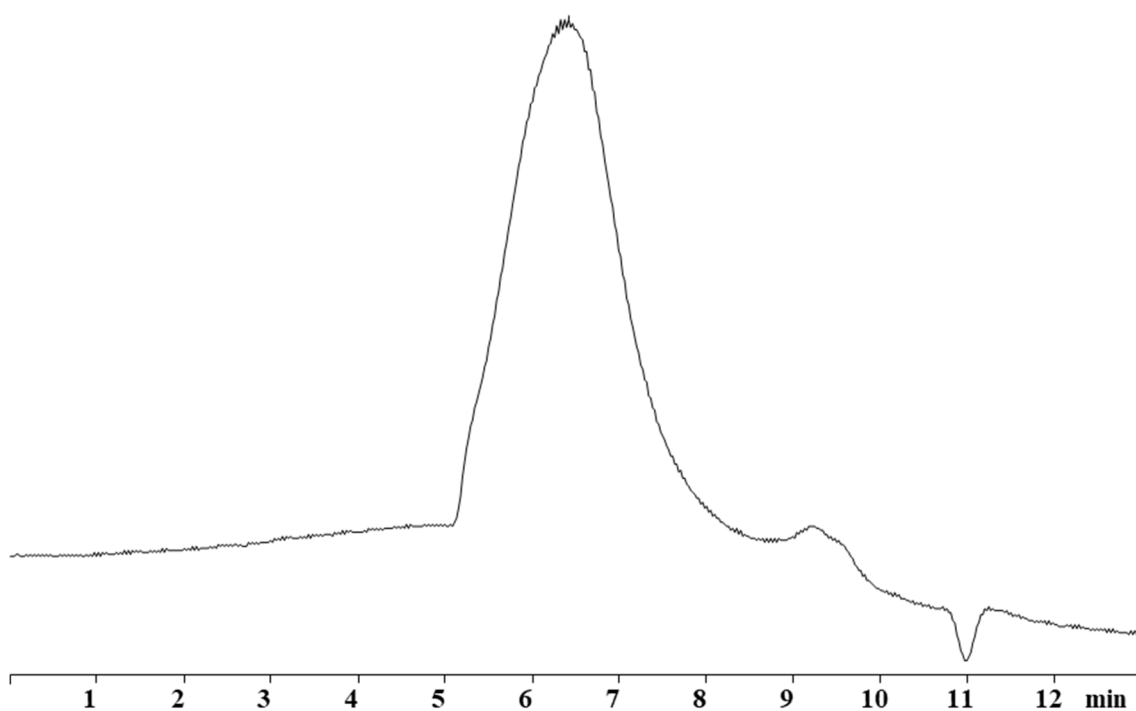

**Figure S2.** GPC curve of P2.

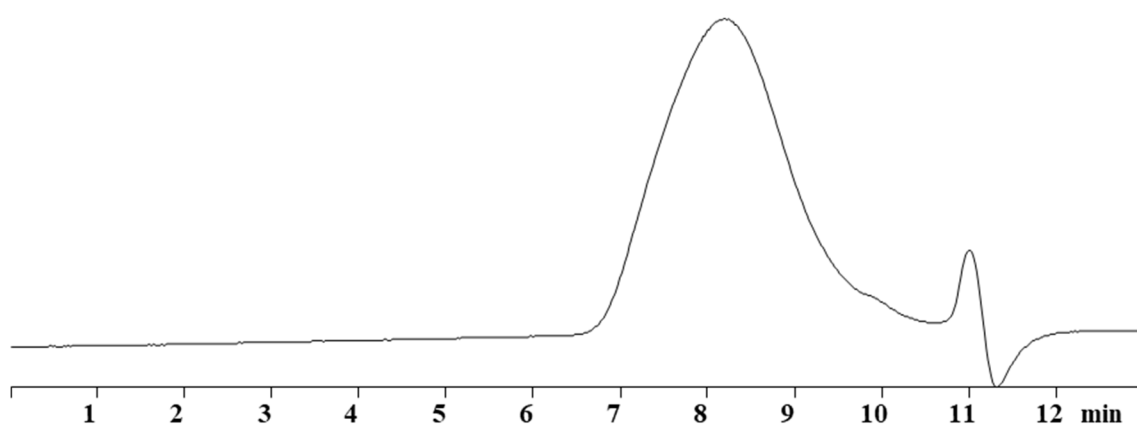

**Figure S3.** GPC curve of P3.

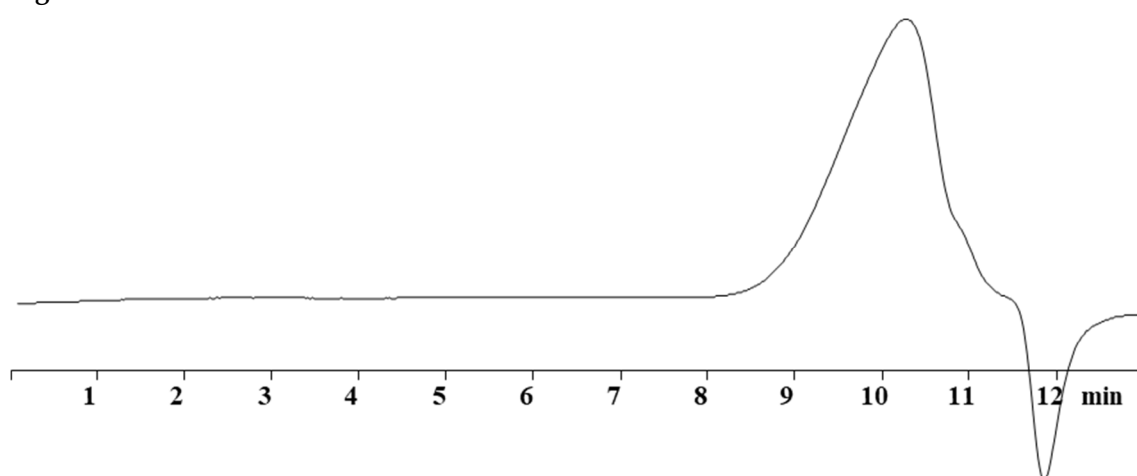

**Figure S4.** GPC curve of M2 and M2\*.

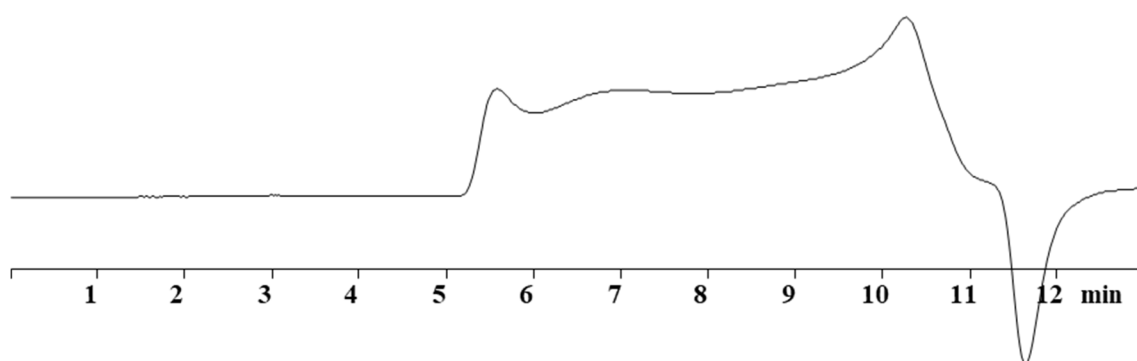

**Figure S5.** GPC curve of M3.

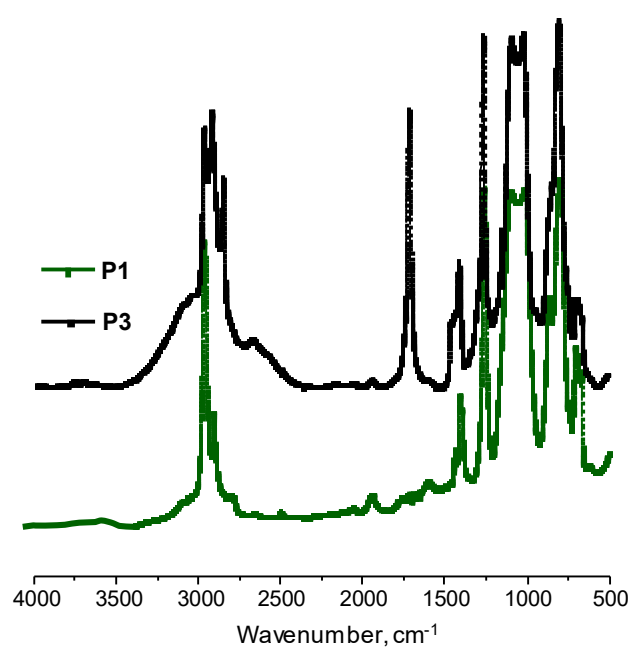

Figure S6. IR spectra of *P1* and *P3*.

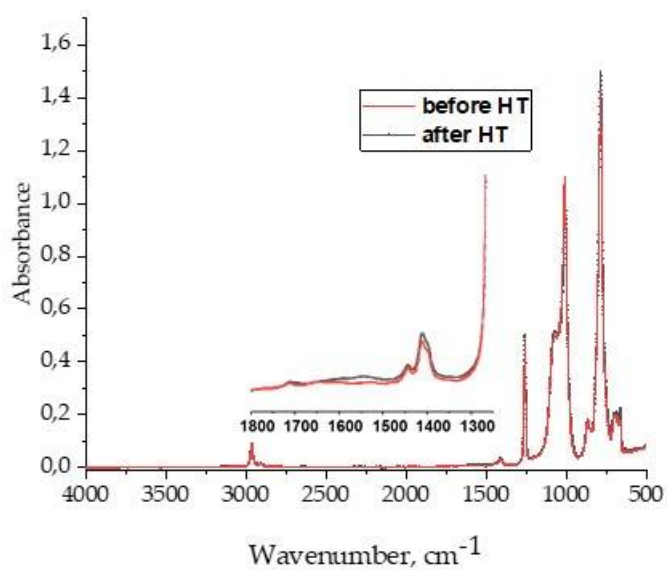

Figure S7. IR spectra of composite Sample 10 before and after heating.
